# Supplementary material for: A digital microfluidic platform coupled with colorimetric loop-mediated isothermal amplification for on-site visual diagnosis of multiple diseases
Source: Royal Society of Chemistry journal article supplement (doi:10.1039/d2lc01156e), 2023-01-01
Supplement: d2lc01156e3.pdf [file d2lc01156e3.pdf]

## A digital microfluidic platform coupled with colorimetric loop-mediated isothermal amplification for on-site visual diagnosis of multiple diseases

Mei Xie,<sup>a,c</sup> Tianlan Chen,<sup>b</sup> Zongwei Cai,<sup>c</sup> Bo Lei<sup>a\*</sup> and Cheng Dong<sup>b,d\*\*</sup>

<sup>a</sup> Department of life science, Beijing Normal University-Hong Kong Baptist University United International College, Zhuhai. 519000, Guangdong, China.

<sup>b</sup> Digifluidic Biotech Ltd., Zhuhai, 519000, Guangdong, China.

<sup>c</sup> Department of Chemistry, Hong Kong Baptist University, Hong Kong SAR, China.

<sup>d</sup> School of Intelligent Systems Science and Engineering, Jinan University, 519000, Guangdong, China.

\*Corresponding author: [Bolei@uic.edu.cn](mailto:Bolei@uic.edu.cn)

\*\* Corresponding author: [dongcheng@jnu.edu.cn](mailto:dongcheng@jnu.edu.cn)

### Supplementary figures and tables

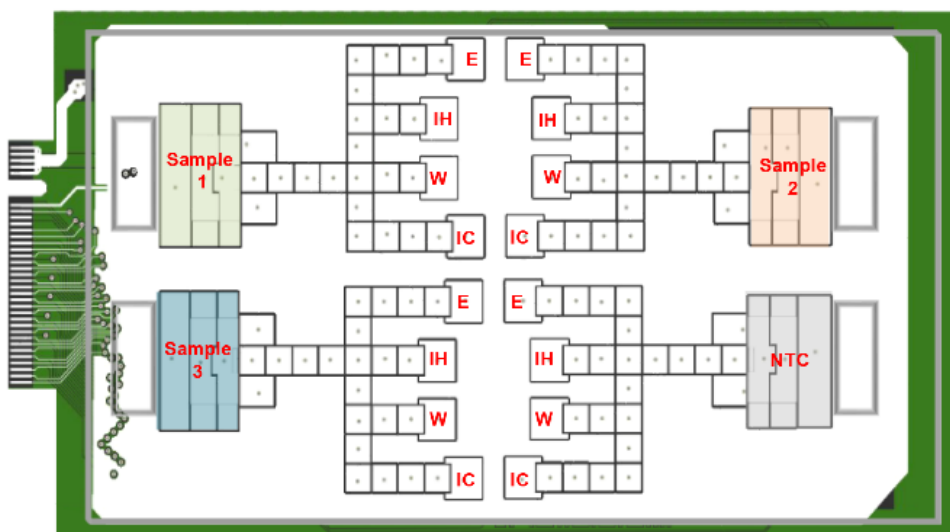

**Fig S1.** Multiplex detection of field shrimp on the DMF chip. For each test, three shrimp samples and no template control (NTC) were simultaneously detected on a chip and each sample was set with four parallel reactions with the primer of *Enterocytozoon hepatopenaei* (E), Infectious hypodermal and hematopoietic necrosis virus (IH) and white spot syndrome virus (W) and internal control (IC), respectively.

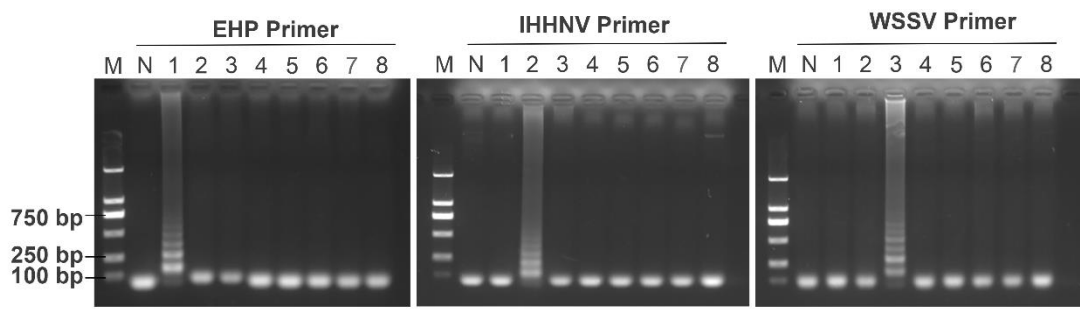

**Fig S2.** Gel electrophoresis results of the cross-reaction. Lane M: DL 2000 DNA ladder; lane N: negative control; lane 1~8: LAMP with genomic DNA of EHP, IHNV, WSSV, EMS, SHIV, *E. coli*, *S. aureus* and *S. typhimurium* respectively.

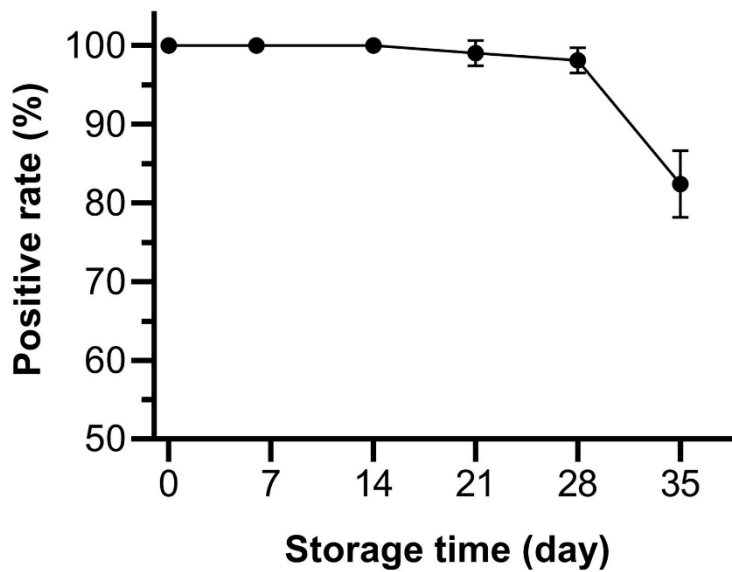

**Fig S3.** Accelerate aging test at 37°C. The performance of stored chips was evaluated at intervals by on-chip LAMP detection using the 10 copies/ $\mu$ l of WSSV gene as the positive sample. The tests were implemented on three independent chips and the positive rates of LAMP were calculated and plotted (n= 36).

**Table S1.** Primer sequences for LAMP reaction

| Target | Primer | Sequence (5'→3')                             |
|--------|--------|----------------------------------------------|
| EHP    | F3     | AAGAAGCAAAAAGAAGGGC                          |
|        | B3     | GTTTTGGTTGCCTGGTT                            |
|        | FIP    | GCAGTAAACTCAGAAGGATCTACTTAGCAGAGCCTCATAGAGAA |
|        | BIP    | CCAGTTGTCAAAGTCAATCAATTCAGCATGGCTTTTGAATTGGC |
|        | LF     | CACCATCTACCTGTACGTTT                         |
| WSSV   | F3     | ACAACACTGTGACCAAGAC                          |
|        | B3     | GTTCTCACCTTGAATGTTT                          |
|        | FIP    | CCCAAGGTGTCGCTGTCAACTGTGACTGCTGAGGTTG        |
|        | BIP    | CCGCAATGGAAAGTCTGATGCCACGGGAGTGATGACAAG      |
|        | LF     | CAGTCATCTTGAAGTAGCCTGA                       |
|        | LB     | ATGATGGAAGAAGATGCGCAT                        |
| IHHNV  | F3     | CCTCCGGATCAGATGACGAA                         |
|        | B3     | TGTTCCGCTACTACAGCTCT                         |
|        | FIP    | CCGCCTGTCTTTTTGTGGTGT-ATCTGGGTACACCACATCGA   |
|        | BIP    | GGAGACAACCGACGACATCAGG-CTCCTCCATCGGTAGGTTCC  |
|        | LB     | TCATGGAAGCAATGGAAATCGAC                      |
